# Supplementary material for: A deformylase inhibitor expands therapeutic options for Lyme disease
Source: Research Square preprint supplement (doi:10.21203/rs.3.rs-9335039/v1), 2026-05-08
Supplement: Supplementary file 1 [file 7105b15287a063652785dbe8.docx]

**Extended Data**

**Extended Data Table 1 |** Minimum inhibitory concentration (MIC) of forazemin and doxycycline against *Borrelia* species.

| ***Borrelia*** | **Forazemin (µg ml-1)** | **Doxycycline (µg ml-1)** |
| --- | --- | --- |
| *Borrelia garinii* DSM 10534 | 1 | 0.5 |
| *Borrelia spielmanii* DSM 16813 | 0.5 | 0.5 |
| *Borrelia californiensis* DSM 17989 | 0.25 | 1 |
| *Borrelia bissettiae* DSM 17990 | 1 | 1 |
| *Borrelia burgdorferi* DSM 4681 | 1 | 1 |
| *Borrelia genomospecies* DSM 17991 | 1 | 1 |
| *Borrelia lanei* DSM 17992 | 0.25 | 2 |
| *Borrelia sinica* DSM 23262 | 2 | 1 |
| *Borrelia mayonii* DSM 102811 | 0.5 | 2 |
| *Borrelia lusitaniae* DSM 107168 | 0.125 | 1 |
| *Borrelia kurtenbachii* ATCC BAA-2495 | 0.25 | 0.5 |
| *Borrelia andersonii* ATCC 700555 | 0.5 | 1 |
| *Borrelia coriaceae* ATCC 43381 | 0.5 | 1 |
| *Borrelia nietonii* TSD-355 | 1 | 1 |
| *Borrelia japonica* ATCC 51557 | 1 | 0.5 |

**Extended Data Fig. 1** **| Time-kill kinetics of forazemin and doxycycline against *Borrelia burgdorferi*.** Mid-logarithmic-phase *B. burgdorferi* B31 cultures were treated with forazemin or doxycycline at 10× MIC. Viable spirochetes were enumerated at the indicated time points by colony forming units (CFU). Data are presented as mean CFU ml⁻¹ ± s.e.m. *(n* = 2 biological replicates).

**Extended Data Fig. 2 |** **Plasma pharmacokinetics of forazemin following single-dose oral administration in mice.** Mice received a single oral dose of forazemin (50 mg kg-1), and plasma samples were collected at the indicated time points and quantified by LC-MS/MS. Data are presented as mean plasma concentration ± s.e.m. (*n* = 3 mice).

**Extended Data Fig. 3 | Blood-brain barrier (BBB) permeability of forazemin and comparator antibiotics assessed in a human in vitro model.** An hCMEC/D3–astrocyte coculture system was used to model the BBB. Antibiotics or caffeine were added apically at 10 µg ml-1 and basolateral drug accumulation was measured at the indicated time points, expressed as a percentage of the initial apical concentration. Data are presented as mean ± s.e.m. (*n* = 3 independent experiments). Statistical significance was determined by one-way ANOVA.  *P* values are shown above relevant datasets.

**Extended Data Fig. 4 | Fecal short-chain fatty acid levels in mice following antibiotic treatment.** Fecal samples collected from mice treated with vehicle, forazemin (FZN) or doxycycline (DOX) were analyzed for total short-chain fatty acids (SCFA) content by competitive ELISA and normalized to fecal weight. Data are presented as mean ± s.e.m. Statistical significance was determined by one-way ANOVA.  *P* values are shown above relevant datasets.


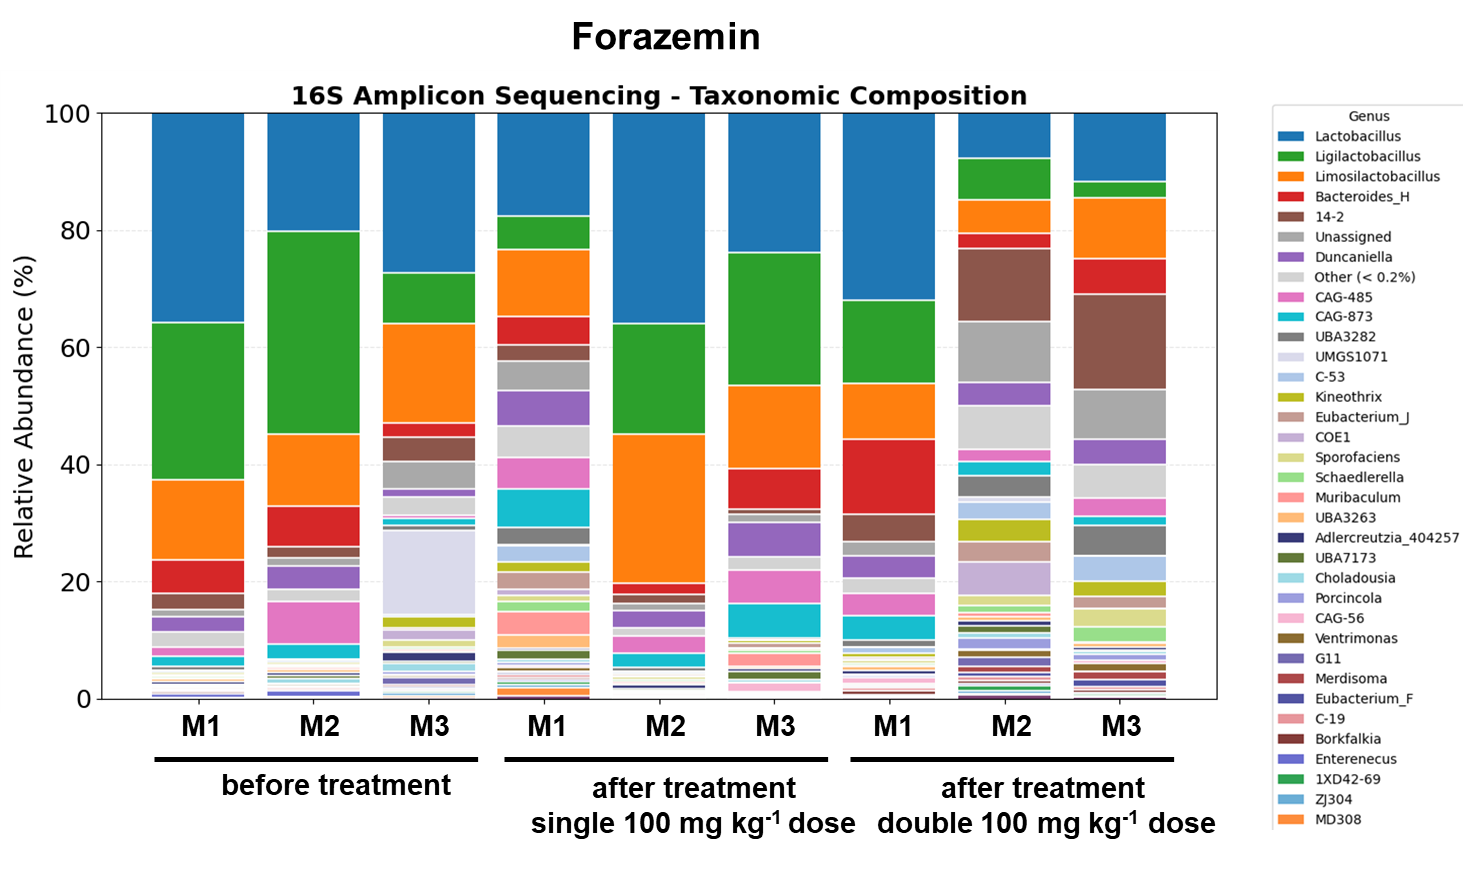


**Extended Data Fig. 5 |** **Impact of forazemin on the murine fecal microbiome at the genus level.** Fecal samples were collected from mice (*n* = 3) before and after treatment with a single or double dose of forazemin (100 mg kg-1). Taxonomic relative abundance at the genus level is shown for each individual mouse.
