# Supplementary material for: A deformylase inhibitor expands therapeutic options for Lyme disease
Source: Research Square preprint supplement (doi:10.21203/rs.3.rs-9335039/v1), 2026-05-08
Supplement: Supplementary file 2 [file bb2111638fdd1a44ede431f4.docx]

**A deformylase inhibitor expands therapeutic options for Lyme disease.**

**Supplementary information**

**Supplementary Table 1.** Differential screening of peptide deformylase inhibitors against bacteria and human cell lines. MIC, minimum inhibitory concentration; CC50, cytotoxic concentration leading to 50% killing of cell lines.

| **Inhibitors** | ***Staphylococcus aureus*HG003** | ***Escherichia coli* MG1655** | ***Borrelia burgdorferi* B31** | **HEK293** |
| --- | --- | --- | --- | --- |
|  | **MIC (µg ml-1)** | | | **CC50 (µg ml-1)** |
| Actinonin | 16 | >32 | 2 | 32-64 |
| GSK 1322322 | 0.5-1 | >32 | 1 | >64 |
| LBM-415 | 0.125 | >32 | 2 | >64 |
| 3AP-2 | 2 | >32 | 8 | 4 |
| NA-2 | 4 | >32 | 16 | 8 |
| BB-3497 | 2 | 16 | 4 | 32 |
| BB-83698 | 8 | >32 | 0.5 | >32 |
| GI254023X | 16 | >32 | 32 | 32 |
| GW280264X | 8 | >32 | 32 | 32 |
| KP-457 | 8 | 32 | 16 | 32 |
| BB-81384 | 8 | >32 | 0.5 | >32 |

**Supplementary Table 2.** Minimum inhibitory concentration (MIC) of forazemin and doxycycline against human commensal bacteria.

| **Commensal bacteria** | **Forazemin (µg ml-1)** | **Doxycycline (µg ml-1)** |
| --- | --- | --- |
| *Lactobacillus gasseri* | 64 | 4 |
| *Lactobacillus vaginalis* | 32 | 2 |
| *Lactobacillus rhamnosus* | 64 | 4 |
| *Lactobacillus acidophilus* | 128 | 4 |
| *Lactococcus* *lactis* | 64 | 4 |
| *Sporolactobacillus inulinus* | 64 | 1 |
| *Bacillus cereus var. toyoi* | 8 | 1 |
| *Bifidobacterium breve* | 8 | 0.5 |
| *Bifidobacterium bifidum* | 8 | 0.5 |
| *Bifidobacterium animalis subsp. lactis* | 8 | 0.5 |
| *Bifidobacterium longum subsp. infantis* | 4 | 0.25 |
| *Bifidobacterium faecale* | 8 | 0.25 |
| *Blautia obeum* | 4 | 0.125 |
| *Phocaeicola vulgatus* | 8 | 0.25 |

**Supplementary Table 3**. Docking scores (standard-precision) of peptide deformylase (PDF) inhibitors to spirochete PDFs (kcal/mol).

| **Inhibitors** | ***Borrelia burgdorferi*** | ***Leptospira interrogans*** |
| --- | --- | --- |
| Actinonin | -11.86 | -12.46 |
| GSK 1322322 | -11.56 | -12.04 |
| LBM-415 | -11.05 | -11.20 |
| 3AP-2 | -9.49 | -9.43 |
| NA-2 | -9.46 | -10.81 |
| BB-3497 | -11.57 | -11.53 |
| BB-83698 (Forazemin) | -12.53 | -12.70 |
| GI254023X | -12.29 | -12.05 |
| GW280264X | -8.63 | -6.80 |
| KP-457 | -9.44 | -9.81 |
| BB-81384 | -11.82 | -11.95 |

**Supplementary Table 4.** Cytotoxicity of forazemin against human cell lines.

| **Human cell lines** | **CC50 (µg ml-1)** |
| --- | --- |
| HepG2 (Liver) | >512 |
| HEK293 (Embryonic kidney) | >512 |
| FaDu (hypopharynx) | >512 |
| A549 (Lung epithelium) | >512 |
| Caco-2 (Large intestine) | >512 |


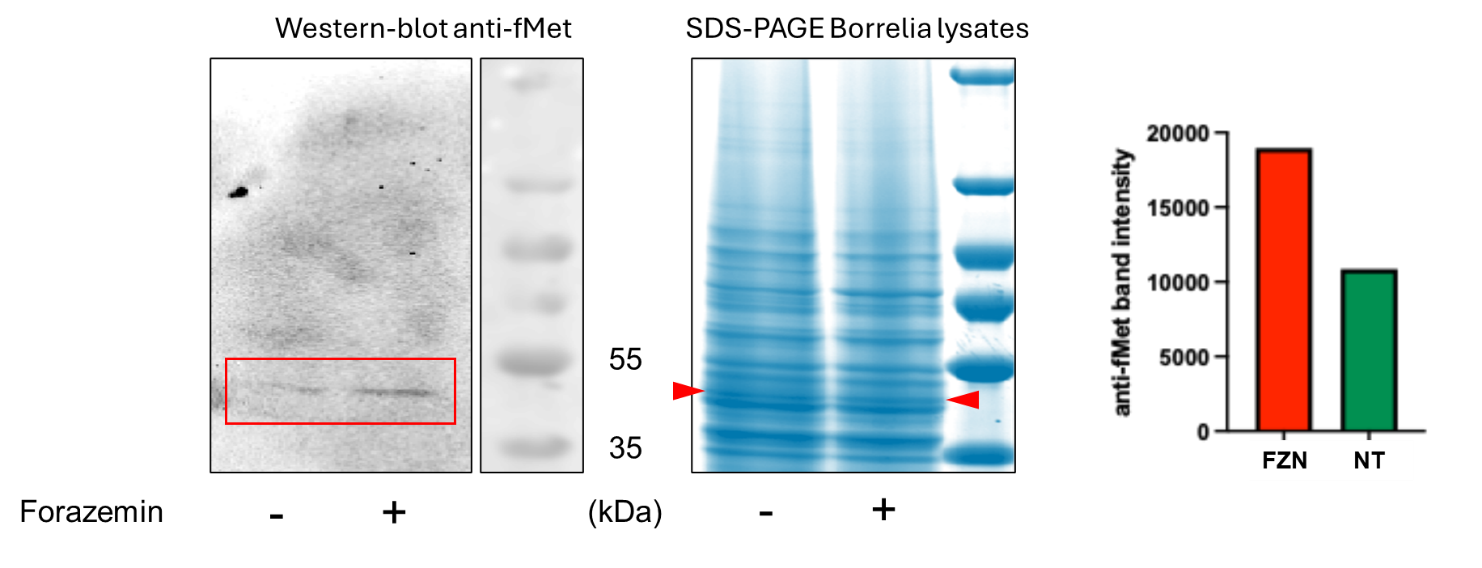


**Supplementary Information Figure 1** Detection of Nt-formylated native proteins in *Borrelia burgdorferi*. Immunoblotting with anti-fMet (mouse monoclonal antibody that specifically detects N-terminal formylmethionine-bearing proteins) and *Borrelia burgdorferi* Bb1286 cells with or without 1 µg ml-1 forazemin treatment. The gel with Coomassie brilliant blue staining indicates equal amounts of loaded samples.


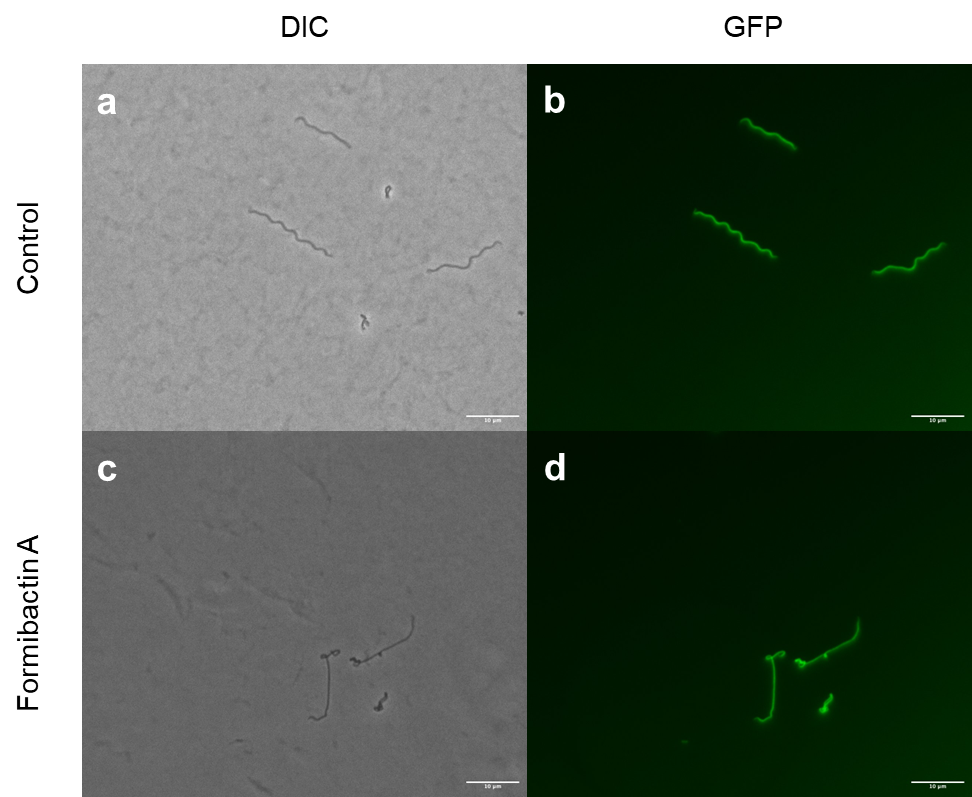


**Supplementary Information Figure 2 Epifluorescence microscopy of forazemin-treated *Borrelia burgdorferi*.** GFP-expressing *B. burgdorferi* Bb1286 (*flaB*-GFP) was treated overnight with forazemin at 10×MIC (5 µg ml⁻¹) in BSK-II medium (35 °C, 3% O₂, 5% CO₂). Cells were fixed in 2.5% glutaraldehyde on poly-L-lysine-coated coverslips. **a, b,** Untreated cells displaying characteristic corkscrew morphology. **c, d,** forazemin-treated cells exhibiting surface blebbing and loss of helical architecture. No cyst-like or pleomorphic forms were observed. Scale bars, 10 µm.

*
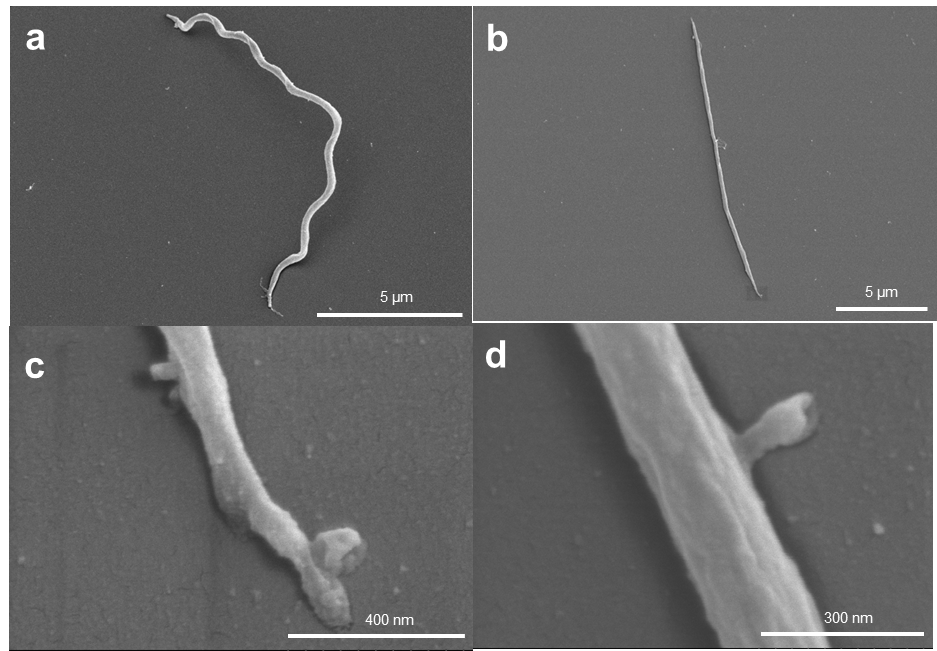
*

**Supplementary Information Figure 3 Scanning electron microscopy of forazemin-treated *Borrelia burgdorferi*.** *B. burgdorferi* Bb1286 was treated overnight with forazemin at 10×MIC (5 µg ml⁻¹) in BSK-II medium (35 °C, 3% O₂, 5% CO₂). Cells were fixed in 2.5% glutaraldehyde, post-fixed in 0.1% osmium tetroxide, dehydrated through a graded ethanol series, critical-point dried, and sputter-coated with platinum prior to imaging on a Hitachi S-4800 field-emission SEM. **a,** Untreated cells with intact spiral morphology. **b–d,** Forazemin-treated cells showing extensive surface blebbing and structural disruption. No cyst-like forms were detected. Respective scale bars is noted on each figure.
